# Supplementary material for: Prevalence of arterial hypertension among Brazilian adolescents: systematic review and meta-analysis
Source: PubMed Central journal article supplement (PMC3847925; doi:10.1186/1471-2458-13-833), 2013-09-11
Supplement: 1471-2458-13-833-S1.pdf [file 1471-2458-13-833-S1.pdf]

### **Additional file 1 – Full search strategy**

#### **Pubmed Search– Sep/09/2010 – <http://www.ncbi.nlm.nih.gov/pubmed/>**

(child\*[Title/Abstract] OR adolesc\*[Title/Abstract] OR adolescent[MeSH] OR child[MeSH]) AND ("blood pressure"[MeSH] OR "blood pressure"[Title/Abstract] OR hypertension[MeSH] OR hypertension[Title/Abstract] OR hypert\*[Title/Abstract]) AND (brazil\*[Title/Abstract] OR brazil[Title/Abstract] OR brazil[MeSH] OR brasil[Title/Abstract] OR "minas gerais"[Title/Abstract] OR "são paulo"[Title/Abstract] OR "espírito santo"[Title/Abstract] OR "rio de janeiro"[Title/Abstract] OR bahia[Title/Abstract] OR Pará[Title/Abstract] OR "mato grosso"[Title/Abstract] OR "mato grosso do sul"[Title/Abstract] OR goiás[Title/Abstract] OR "rio grande do sul"[Title/Abstract] OR ceará[Title/Abstract] OR pernambuco[Title/Abstract] OR "santa catarina"[Title/Abstract] OR amazonas[Title/Abstract] OR maranhão[Title/Abstract] OR tocantins[Title/Abstract] OR piauí[Title/Abstract] OR rondônia[Title/Abstract] OR roraima[Title/Abstract] OR paraná[Title/Abstract] OR acre[Title/Abstract] OR amapá[Title/Abstract] OR paraíba[Title/Abstract] OR "rio grande do norte"[Title/Abstract] OR alagoas[Title/Abstract] OR sergipe[Title/Abstract] OR "distrito federal"[Title/Abstract]) Publication Date from 1990 to 2010

#### **Scopus Search– Sep/13/2010 – <http://www.scopus.com/home/url>**

(TITLE-ABS-KEY(child\* OR adolesc\*) AND TITLE-ABS-KEY("blood pressure" OR hypertension OR hypert\*) AND TITLE-ABS-KEY(brazil\* OR brazil OR brasil OR "minas gerais" OR "são paulo" OR "espírito santo" OR "rio de janeiro" OR bahia OR Pará OR "mato grosso" OR "mato grosso do sul" OR goiás OR "rio grande do sul" OR ceará OR pernambuco OR "santa catarina" OR amazonas OR maranhão OR tocantins OR piauí OR rondônia OR roraima OR paraná OR acre OR amapá OR paraíba OR "rio grande do norte" OR alagoas OR sergipe OR "distrito federal")) AND PUBYEAR AFT 1989

#### **Isi Web of Science Search – Sep/13/2010 – <http://apps.webofknowledge.com>**

TS=(child\* OR adolesc\*) AND TS=("blood pressure" OR hypertension OR hypert\*) AND TS=(brazil\* OR brazil OR brasil OR "minas gerais" OR "sao paulo" OR "espírito santo" OR "rio de janeiro" OR bahia OR para OR "mato grosso" OR "mato grosso do sul" OR goias OR "rio grande do sul" OR ceara OR pernambuco OR "santa catarina" OR amazonas OR maranhao OR tocantins OR piauui OR rondonia OR roraima OR parana OR acre OR amapa OR paraiba OR "rio grande do norte" OR alagoas OR sergipe OR "distrito federal") Timespan=1990-2010. Databases=SCI-EXPANDED, SSCI, A&HCI.

#### **Adolec Search – Sep/13/2010 – <http://www.adolec.br/php/index.php>**

criança\$ OR adolesc\$ [Palavras] and "pressão arterial" OR hipertensão OR hipert\$ [Palavras] and brasil\$ OR brasil OR "minas gerais" OR "são paulo" OR "espírito santo" OR "rio de janeiro" OR bahia OR Pará OR "mato grosso" OR "mato grosso do sul" OR goiás OR "rio grande do sul" OR ceará OR pernambuco OR "santa catarina" OR amazonas OR maranhão OR tocantins OR piauí OR rondônia OR roraima OR paraná OR acre OR amapá OR paraíba OR "rio grande do norte" OR alagoas OR sergipe OR "distrito federal" [Palavras] "data limit option not available"

**Lilacs – Sep/13/2010 – <http://lilacs.bvsalud.org/>**

**English Search:** child\$ OR adolesc\$ [Words] and "blood pressure" OR hypertension OR hypert\$ [Words] and brazil\$ OR brazil OR brasil OR "minas gerais" OR "são paulo" OR "espírito santo" OR "rio de janeiro" OR bahia OR para\$ OR "mato grosso" OR "mato grosso do sul" OR goiás OR "rio grande do sul" OR ceará OR pernambuco OR "santa catarina" OR amazonas OR maranhão OR tocantins OR piauí OR rondônia OR roraima OR paraná OR acre OR amapá OR paraíba OR "rio grande do norte" OR alagoas OR sergipe OR "distrito federal" [Words] "data limit option not available"

**Portuguese Search:** criança\$ OR adolesc\$ [Palavras] and "pressão arterial" OR hipertensão OR hipert\$ [Palavras] and brasil\$ OR brasil OR "minas gerais" OR "são paulo" OR "espírito santo" OR "rio de janeiro" OR bahia OR para\$ OR "mato grosso" OR "mato grosso do sul" OR goiás OR "rio grande do sul" OR ceará OR pernambuco OR "santa catarina" OR amazonas OR maranhão OR tocantins OR piauí OR rondônia OR roraima OR paraná OR acre OR amapá OR paraíba OR "rio grande do norte" OR alagoas OR sergipe OR "distrito federal" [Palavras] "data limit option not available"

**SciELO – Sep/22/2010 – <http://www.scielo.org>**

**Portuguese Search:** SciELO.org > Pesquisa > (criança\$ OR adolesc\$) and ("pressão arterial" OR hipertensão OR hipert\$) and (brasil\$ OR brasil OR "minas gerais" OR "são paulo" OR "espírito santo" OR "rio de janeiro" OR bahia OR para\$ OR "mato grosso" OR "mato grosso do sul" OR goiás OR "rio grande do sul" OR ceará OR pernambuco OR "santa catarina" OR amazonas OR maranhão OR tocantins OR piauí OR rondônia OR roraima OR paraná OR acre OR amapá OR paraíba OR "rio grande do norte" OR alagoas OR sergipe OR "distrito federal") "data limit option not available"

**English Search:** SciELO.org > Search > (child\$ OR adolesc\$) and ("blood pressure" OR hypertension OR hypert\$) and (brazil\$ OR brazil OR brasil OR "minas gerais" OR "são paulo" OR "espírito santo" OR "rio de janeiro" OR bahia OR para\$ OR "mato grosso" OR "mato grosso do sul" OR goiás OR "rio grande do sul" OR ceará OR pernambuco OR "santa catarina" OR amazonas OR maranhão OR tocantins OR piauí OR rondônia OR roraima OR paraná OR acre OR amapá OR paraíba OR "rio grande do norte" OR alagoas OR sergipe OR "distrito federal") "data limit option not available"
