# Supplementary material for: Prevalence of arterial hypertension among Brazilian adolescents: systematic review and meta-analysis
Source: PubMed Central journal article supplement (PMC3847925; doi:10.1186/1471-2458-13-833), 2013-09-11
Supplement: 1471-2458-13-833-S3.pdf [file 1471-2458-13-833-S3.pdf]

Meta-regression: Univariate Analysis

| Variable                                | Total Population |       | Male        |       | Female      |       |
|-----------------------------------------|------------------|-------|-------------|-------|-------------|-------|
|                                         | Coefficient      | p     | Coefficient | p     | Coefficient | p     |
| <b>Age</b>                              | 0.132            | 0.186 | 0.272       | 0.052 | 0.077       | 0.645 |
| <b>Region</b>                           |                  |       |             |       |             |       |
| Southeast                               | Reference        |       |             |       |             |       |
| Northeast                               | 0.574            | 0.110 | 0.883       | 0.031 | 0.754       | 0.126 |
| South                                   | 0.726            | 0.159 | 0.761       | 0.127 | 1.262       | 0.053 |
| Midwest                                 | -0.839           | 0.212 | -0.819      | 0.180 | -0.254      | 0.726 |
| <b>Sample</b>                           |                  |       |             |       |             |       |
| Random                                  | Reference        |       |             |       |             |       |
| Non random                              | 0.095            | 0.814 | -0.237      | 0.726 | -2.006      | 0.043 |
| <b>Instrument</b>                       |                  |       |             |       |             |       |
| Auscultatory                            | Reference        |       |             |       |             |       |
| Oscilometric                            | -0.042           | 0.915 | 0.016       | 0.972 | 0.250       | 0.615 |
| <b>Sample</b>                           |                  |       |             |       |             |       |
| School                                  | Reference        |       |             |       |             |       |
| Household                               | 0.121            | 0.871 | 0.261       | 0.742 | 0.159       | 0.856 |
| <b>Sample Size</b>                      |                  |       |             |       |             |       |
| <250                                    | Reference        |       |             |       |             |       |
| 250-499                                 | -1.029           | 0.040 | -0.540      | 0.460 | -1.104      | 0.224 |
| 500-999                                 | -0.324           | 0.497 | 0.110       | 0.885 | -0.462      | 0.611 |
| ≥ 1000                                  | -0.302           | 0.523 | 0.132       | 0.862 | -0.290      | 0.747 |
| <b>Year of Data Collection</b>          | 0.011            | 0.726 | 0.050       | 0.400 | 0.058       | 0.288 |
| <b>Number of BP Measurements</b>        | -0.241           | 0.135 | -0.245      | 0.181 | -0.287      | 0.144 |
| <b>Interval between BP Measurements</b> | 0.016            | 0.739 | 0.022       | 0.707 | 0.020       | 0.781 |
| <b>Measurement</b>                      |                  |       |             |       |             |       |
| Used first measure                      | Reference        |       |             |       |             |       |
| Any other                               | -0.047           | 0.903 | -0.218      | 0.714 | -0.261      | 0.682 |
| <b>Percentage of males</b>              | 0.032            | 0.383 | -           | -     | -           | -     |

BP - Blood pressure
